# Supplementary material for: Top-down synthesis of polyoxometalate-like sub-nanometer molybdenum-oxo clusters as high-performance electrocatalysts
Source: PubMed Central journal article supplement (PMC8146420; doi:10.1039/c9sc05469c), 2019-12-05
Supplement: SC-011-C9SC05469C-s001.pdf [file SC-011-C9SC05469C-s001.pdf]

## Electronic Supplementary Information

### Top-down Synthesis of Polyoxometalate-like Sub-Nanometer Molybdenum-Oxo Clusters as High-Performance Electrocatalysts

Rongji Liu,<sup>\*ab</sup> Kecheng Cao,<sup>c</sup> Adam H. Clark,<sup>d</sup> Peilong Lu,<sup>be</sup> Montaha Anjass,<sup>af</sup> Johannes Biskupek,<sup>c</sup> Ute Kaiser,<sup>cf</sup> Guangjin Zhang,<sup>\*b</sup> and Carsten Streb<sup>\*af</sup>

<sup>a</sup>Ulm University, Institute of Inorganic Chemistry I, Albert-Einstein-Allee 11, 89081 Ulm, Germany.

<sup>b</sup>CAS Key Laboratory of Green Process and Engineering, Institute of Process Engineering, Chinese Academy of Sciences, 100190, Beijing, China.

<sup>c</sup>Central Facility of Electron Microscopy for Materials Science, Ulm University, 89081 Ulm, Germany.

<sup>d</sup>Paul Scherrer

Institut, Forschungsstrasse 111, Villigen, CH-5232, Switzerland

<sup>e</sup>University of Chinese Academy of Sciences, 100049, Beijing, China.

<sup>f</sup>Helmholtz-Institute Ulm for Electrochemical Energy Conversion, Helmholtzstr. 11, 89081 Ulm, Germany.

\*Emails: carsten.streb@uni-ulm.de; rongji.liu@uni-ulm.de; zhanggj@ipe.ac.cn

#### Table of Contents

1. Experimental Methods
2. Supplementary Note 1
3. Supplementary Data, Figures S1 to S13, Tables S1 to S5
4. Supplementary References

### 1. Experimental Methods

**TEM and HRTEM** measurements were performed using an image-side aberration corrected FEI Titan 80-300 at 80 kV accelerating voltage. Electron energy loss spectra were collected using a Gatan GIF 965 spectrometer.

**HAADF-STEM** and **EDS** were performed using a probe-corrected JEOL JEM-ARM200F TEM/STEM at 100 kV accelerating voltage and a Thermofisher Talos 200X equipped with a high dedicated high efficient EDS detector (0.9 sr collection angle) at 200 kV accelerating voltage. Both systems were also used to acquire local EDS mappings.

**PXRD** studies were performed on a BRUKER D8 Advance XRD unit using Cu-K $\alpha$  ( $\lambda = 1.54 \text{ \AA}$ ).

**XPS** analysis was performed on ESCALAB250 Thermo Electron Corporation equipment with an Al Ka X-ray source (1486.6 eV). The X-ray source was run at a reduced power of 150 W, and the pressure in the analysis chamber was maintained at  $<10^{-11}$  Pa.

**ICP-OES** was performed on a Perkin Elmer Plasma 400 spectrometer. CV and LSV experiments were performed on a CHI 730E electrochemical workstation (CH Instruments Inc.).

**EIS** experiments were performed on a CHI 760E electrochemical system (CH Instruments Inc.) in the frequency range from 1000 kHz to 0.01 Hz with modulation amplitude of 5 mV.

**XAS analysis:** Ex-situ Mo K-edge XAS experiments were carried out at the SuperXAS beamline of the Swiss Light Source. The storage ring operated at 2.4 GeV in top-up mode with a ring current of 400 mA. The polychromatic X-ray beam resulting from a 2.9 Tesla bending magnet was collimated by a Pt-coated mirror at 2.5 mrad (which also served to reduce higher-order harmonics) and subsequently monochromatised by a Si(111) channel-cut monochromator. Data were collected in transmission geometry using the quick-scanning extended X-ray absorption fine-structure spectroscopy (QEXAFS) mode at 1 Hz monochromator oscillation frequency. Ionization chambers 15 cm long were filled with 2 bar N<sub>2</sub>-filled. A Mo reference foil mounted between the second and third ionization chambers was measured simultaneously for absolute energy calibration. The samples were prepared as 13 mm pellets with the MoO<sub>2</sub>, MoO<sub>3</sub> and sample **1** prepared with approximately 20 mg diluted with 40 mg of cellulose. Sample **2** and **3** were prepared with 100 mg of sample. The QEXAFS spectra were processed using a bespoke python program to extract individual XAS spectra, calibrate, normalise and average 5 minutes of data.

## 2. Supplementary Note 1

### Electrocatalytic ORR

In alkaline solutions, the reduction of O<sub>2</sub> can proceed by two pathways:<sup>1</sup>

(1) Direct O<sub>2</sub> reduction to OH<sup>-</sup> ions, the direct four-electron pathway (I):

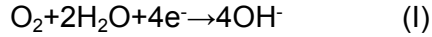

(2) O<sub>2</sub> reduction to HO<sub>2</sub><sup>-</sup> ions, a two-electron pathway (II):

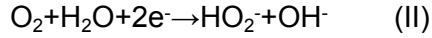

followed by either an additional two-electron reduction of peroxide ions to OH<sup>-</sup> ions (III):

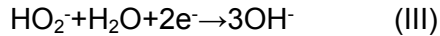

or the decomposition reaction (IV):

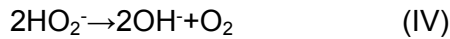

In order to establish the exact pathway of oxygen reduction involved at a particular electrode surface, RDE experiments were performed to examine the kinetics of ORR. For this purpose, RDE-LSV experiments were performed and the working electrode was scanned cathodically at a rate of 5 mV s<sup>-1</sup> with varying rotating speed from 400 rpm to 1600 rpm. Koutecky–Levich (K-L) plots obtained from the LSV curves ( $J^{-1}$  vs.  $\omega^{-0.5}$ ) were analyzed at various electrode potentials. The slopes of their linear fit were used to calculate the transferred electron number ( $n$ ) per oxygen molecule involved in the oxygen reduction at each of the electrodes on the basis of the K-L equation:<sup>2</sup>

$$\frac{1}{J} = \frac{1}{J_k} + \frac{1}{B\omega^{0.5}}$$

where  $J$  is the measured current density at a given potential,  $J_k$  is the kinetic current density, and  $\omega$  is the electrode rotating rate. Therefore,  $1/B$  is the calculated slope and its unit is mA<sup>-1</sup> cm<sup>2</sup> rpm<sup>0.5</sup>.  $B$  could be determined from the slope of K-L plots based on the Levich equation as follows:

$$B = 0.2nF(D_{\text{O}_2})^{2/3}\nu^{-1/6}C_{\text{O}_2}$$

where  $n$  represents the number of electrons transferred per oxygen molecule,  $F$  is the Faraday constant ( $F = 96485 \text{ C mol}^{-1}$ ),  $D_{\text{O}_2}$  is the diffusion coefficient of O<sub>2</sub> in 0.1 M KOH ( $1.9 \times 10^{-5} \text{ cm}^2 \text{ s}^{-1}$ ),  $\nu$  is the kinetic viscosity ( $0.01 \text{ cm}^2 \text{ s}^{-1}$ ), and  $C_{\text{O}_2}$  is the bulk concentration of O<sub>2</sub> ( $1.2 \times 10^{-6} \text{ mol cm}^{-3}$ ). The constant 0.2 is adopted when the rotation speed is expressed in rpm.<sup>3</sup>

The RRDE technique is another efficient method to estimate the electron transfer number ( $n$ ), in which the peroxide species produced at the disk electrode were detected by the ring electrode. For this purpose, the LSV was recorded and the disk electrode was scanned cathodically with a rotation speed of 1600 rpm at a scan rate of  $5 \text{ mV s}^{-1}$ , and the ring potential was constant at 1.45 V vs. RHE. The %  $\text{HO}_2^-$  and  $n$  were calculated from the ratio of the ring current ( $I_r$ ) and the disk current ( $I_d$ ) following the equations given below:<sup>4</sup>

$$\% \text{HO}_2^- = 200 \times \frac{I_r/N}{I_d + I_r/N}$$

$$n = 4 \times \frac{I_d}{I_d + I_r/N}$$

where  $N$  is current collection efficiency of the Pt ring (0.4).

### Calculation of the maximum number of Mo centers

The standard  $\text{MoO}_3$  (molybdate) crystal lattice has a unit cell volume  $V_{\text{UC}} = 0.228 \text{ nm}^3$ ,<sup>5</sup> each unit cell contains 4 Mo centers, so that per  $1 \text{ nm}^3$ , there are  $\sim 17.5$  Mo centers. Thus, for the maximum observed particle size (1.3 nm diameter,  $V_{\text{particle}} \sim 1.15 \text{ nm}^3$ ), there are approximately 20 Mo atoms.

## 3. Supplementary Data

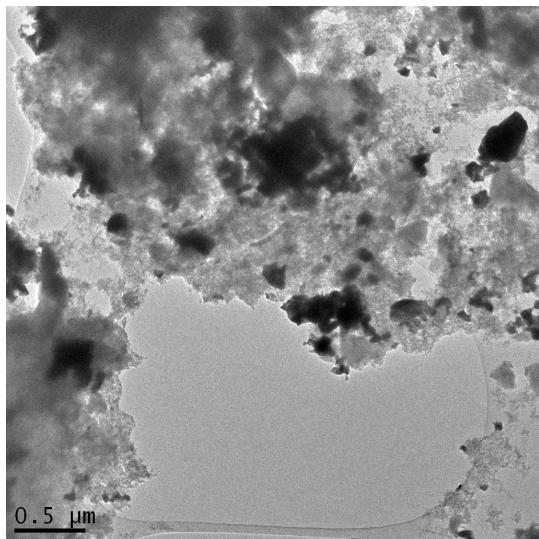

**Figure S1** Low-magnification TEM image of **1**.

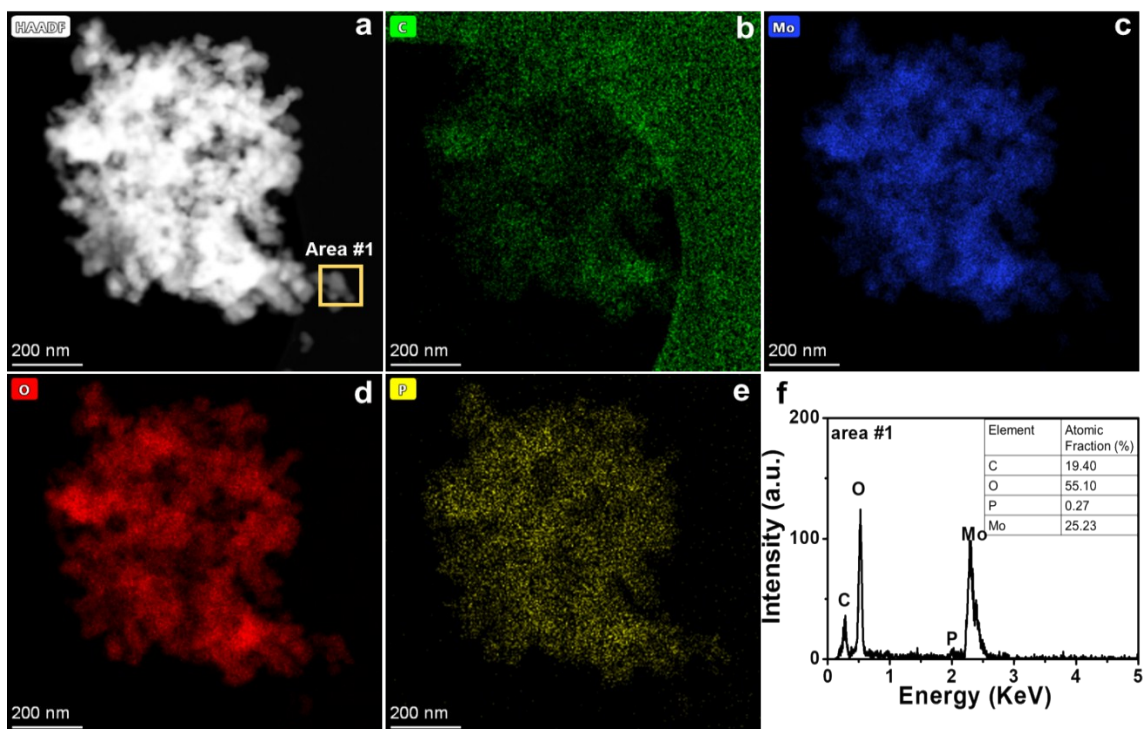

**Figure S2** HAADF-STEM (a) and corresponding EDS mapping (b-e) of **1**, showing the homogeneous dispersion of Mo, P and O on carbon matrix. (f) Integrated EDS spectrum and quantitative element analysis collected from the area #1 shown in (a). The quantitative EDX analysis shows a stoichiometry of about 1:2 between Mo and O and therefore confirms the presence of  $\text{MoO}_2$ .

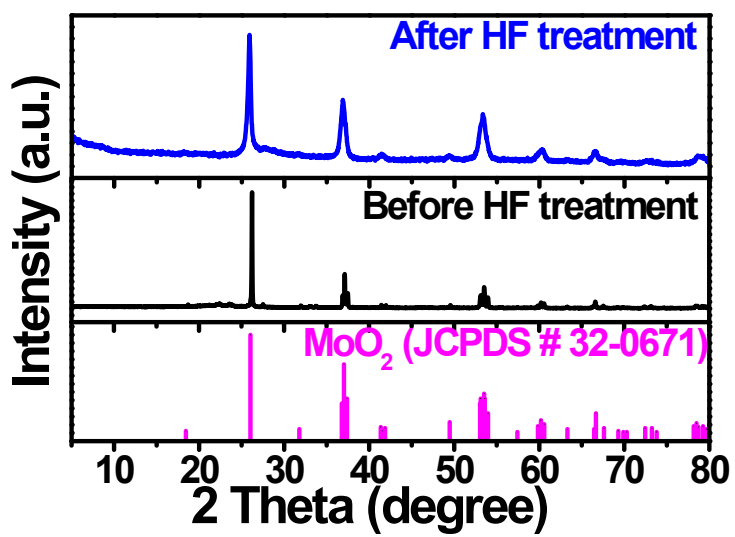

**Figure S3** PXRD spectra of **1** before and after HF treatment, which shows similar structural features for MoO<sub>2</sub>.

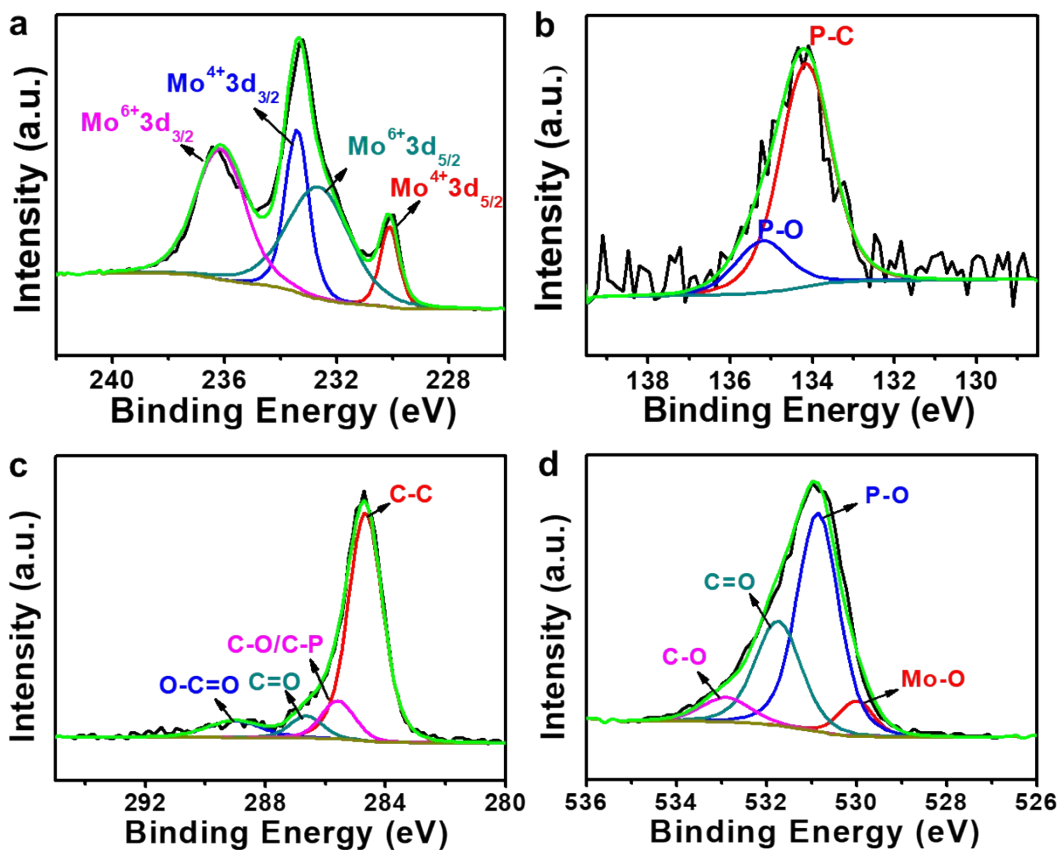

**Figure S4** High-resolution XPS spectra for **1**. a, Mo 3d. b, P 2p. c, C 1s and d, O 1s.

Figure S4 shows the high-resolution Mo 3d, P 2p, C 1s and O 1s XPS spectra for **1**. Deconvolution for Mo 3d (Figure S4a) gives four peaks assigned to Mo 3d<sub>5/2</sub> (230.1 eV) and Mo 3d<sub>3/2</sub> (233.4 eV) for Mo (IV) included in the MoO<sub>2</sub>, and Mo 3d<sub>5/2</sub> (232.6 eV) and Mo 3d<sub>3/2</sub> (236.1 eV) for Mo (VI) assigned to MoO<sub>3</sub>, formed by surface oxidation of the metastable MoO<sub>2</sub> in air.<sup>6,7</sup> For P 2p (Figure S4b), deconvolution gives two peaks assigned to P-C (134.2 eV) and P-O (135.2 eV),<sup>8</sup> suggesting that P was incorporated into the carbon framework. For C 1s (Figure S4c), four peaks centered at 284.7, 285.6, 286.6 and 289.1 eV can be attributed to C-C, C-O/C-P, C=O and O-C=O, respectively,<sup>8</sup> further confirming that P was integrated into the carbon framework. For O 1s (Figure S4d), the broad peak can be deconvoluted into four peaks centered at 530.0, 530.9, 531.7 and 532.9 eV assigned to Mo-O, P-O, C=O and C-O.<sup>9</sup>

**Table S1** The binding energies (eV) of Mo 3d, P 2p, C 1s, O 1s and N 1s for different materials

|       |                                    | Composite 1 | Composite 2 | Composite 3 |
|-------|------------------------------------|-------------|-------------|-------------|
| Mo 3d | Mo <sup>IV</sup> 3d <sub>3/2</sub> | 233.4       | 234.0       | 234.0       |
|       | Mo <sup>IV</sup> 3d <sub>5/2</sub> | 230.1       | 230.8       | 230.8       |
|       | Mo <sup>VI</sup> 3d <sub>3/2</sub> | 236.1       | 236.0       | 236.0       |
|       | Mo <sup>VI</sup> 3d <sub>5/2</sub> | 232.6       | 232.9       | 232.8       |
| P 2p  | P-C                                | 134.2       | 133.8       | 133.8       |
|       | P-O                                | 135.2       | 135.0       | 135.2       |
| C 1s  | C-C                                | 284.7       | 284.7       | 284.8       |
|       | C-O/C-P (/C=N)                     | 285.6       | 285.7       | 285.5       |
|       | C=O (/C-N)                         | 286.6       | 286.8       | 286.7       |
|       | O-C=O                              | 289.1       | 288.7       | 288.1       |
| O 1s  | P-O                                | 530.9       | 531.0       | 530.7       |
|       | C=O                                | 531.7       | 531.7       | 531.7       |
|       | C-O                                | 532.9       | 532.9       | 533.1       |
|       | Mo-O                               | 530.0       | 530.4       | 530.1       |
| N 1s  | Pyridinic N                        | -           | -           | 398.6       |
|       | Pyrrolic N                         | -           | -           | 399.9       |
|       | Graphitic N                        | -           | -           | 401.0       |

**Table S2** Nitrogen sorption analyses for different materials

| Samples    | BET specific surface area (m <sup>2</sup> /g) | Pore volume (cm <sup>3</sup> /g) by DFT calculation | Pore diameter (nm) by DFT calculation |
|------------|-----------------------------------------------|-----------------------------------------------------|---------------------------------------|
| <b>1</b>   | 52.23                                         | 0.097                                               | 2.769                                 |
| <b>2</b>   | 740.71                                        | 1.060                                               | 2.769                                 |
| <b>3</b>   | 822.74                                        | 0.660                                               | 1.543                                 |
| <b>MC</b>  | 853.53                                        | 1.521                                               | 5.199                                 |
| <b>OMC</b> | 690.93                                        | 1.293                                               | 5.199                                 |
| <b>NMC</b> | 431.69                                        | 0.856                                               | 4.543                                 |

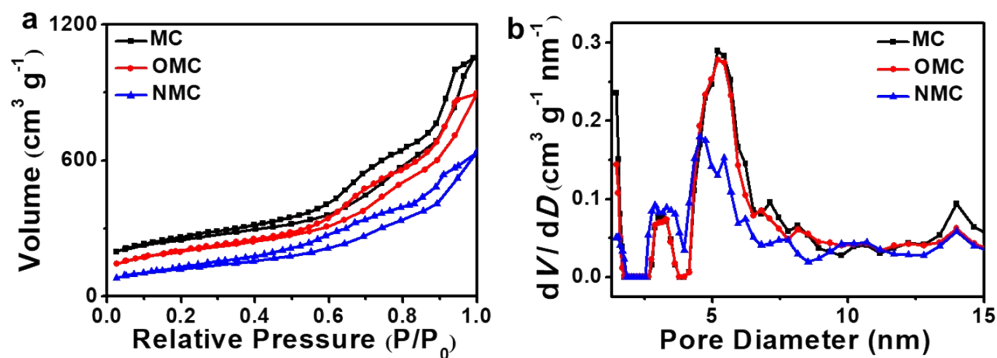

**Figure S5** Nitrogen adsorption-desorption analysis. a, Nitrogen adsorption-desorption isotherms and b, the corresponding DFT pore size distributions of MC, OMC and NMC.

The N<sub>2</sub> sorption isotherm curves for all samples (**1**, **2** and **3**) displayed a similar IV-type isotherm characteristic for micro/mesoporous materials (Figure 2b of main manuscript). This is in agreement with the reference samples prepared by classical methods (**MC**, **OMC** and **NMC**, see Figure S5a). Compared with pure **MC**, **1** exhibited a significantly lower Brunauer–Emmett–Teller (BET) surface area. The BET surface area of **2** (740.7 m<sup>2</sup>/g) and **3** (822.7 m<sup>2</sup>/g) (*i.e.* after HNO<sub>3</sub> oxidation) are increased compared with **1** (52.2 m<sup>2</sup>/g), indicating significant structural changes and increasing porosity upon the oxidative treatment. In contrast, for the reference samples prepared by classical procedures, the BET surface area (Figure S5a) of **OMC** (690.9 m<sup>2</sup>/g) and **NMC** (431.7 m<sup>2</sup>/g) decreased notably compared with **MC** (853.5 m<sup>2</sup>/g), indicating that the presence of the Mo oxide might play a role in porosity generation. The pore size distributions of all samples were calculated by density functional theory (DFT) modelling, see Figure 2c of main manuscript and Figure S5b. While **MC** only showed mesopores, **1** showed the presence of micropores together with a low cumulative pore volume. In contrast, **2** and **3** feature mesoporosity also (Figure 2c of main manuscript) which leads to the higher overall porosity observed and a larger cumulative pore volumes compared with **1**.



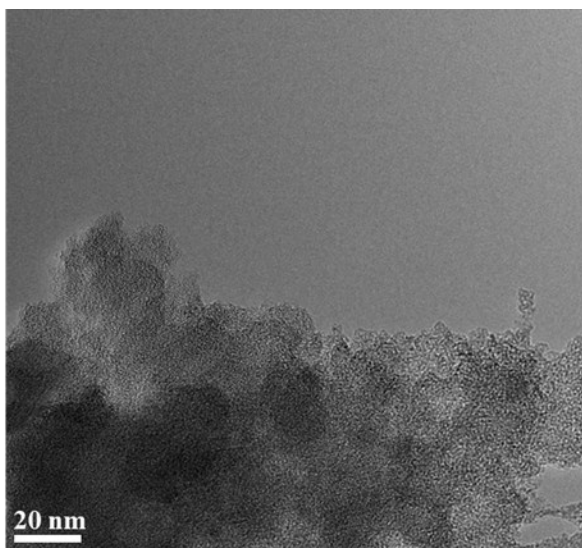

**Figure S6** Representative overview TEM image of **2**.

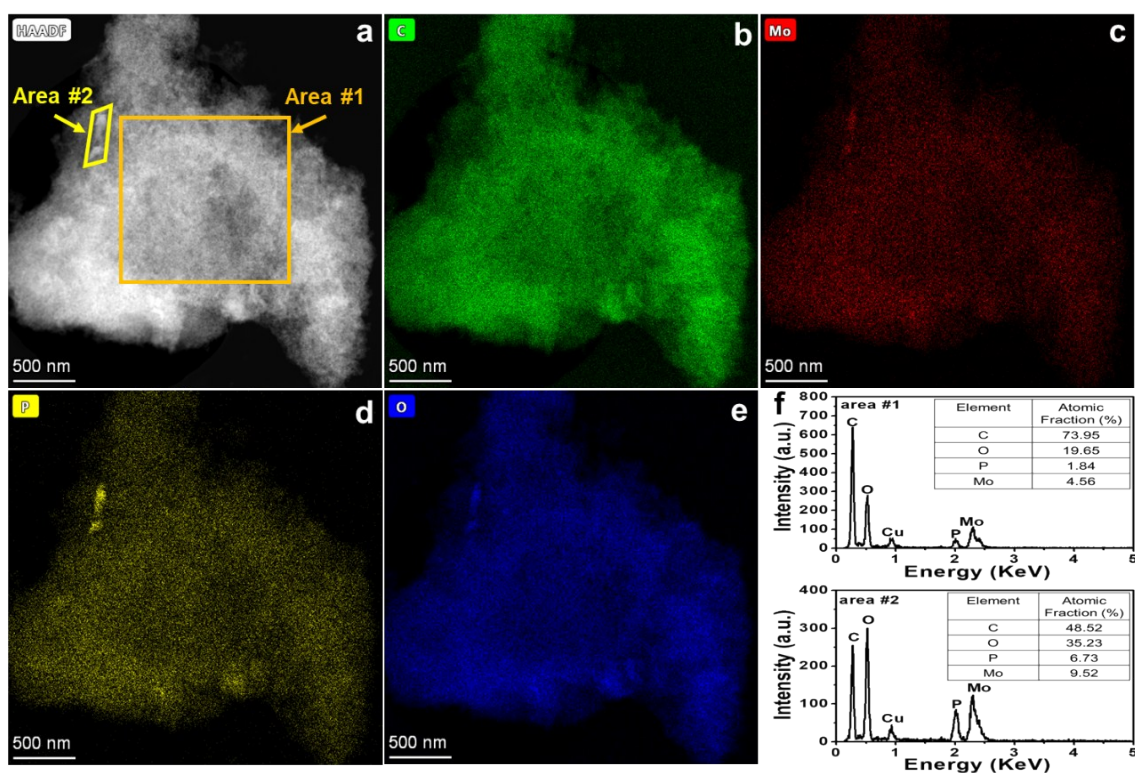

**Figure S7** HAADF-STEM (a) and corresponding EDS mapping (b-e) of **2**, showing the homogeneous dispersion of Mo, P and O on the carbon matrix. (f) Integrated EDS spectra together with quantitative analysis collected from the area #1 (top) and area #2 (bottom) shown in (a). Area #2 in (a) shows amorphous aggregates that contain higher amounts of Mo, P and O.

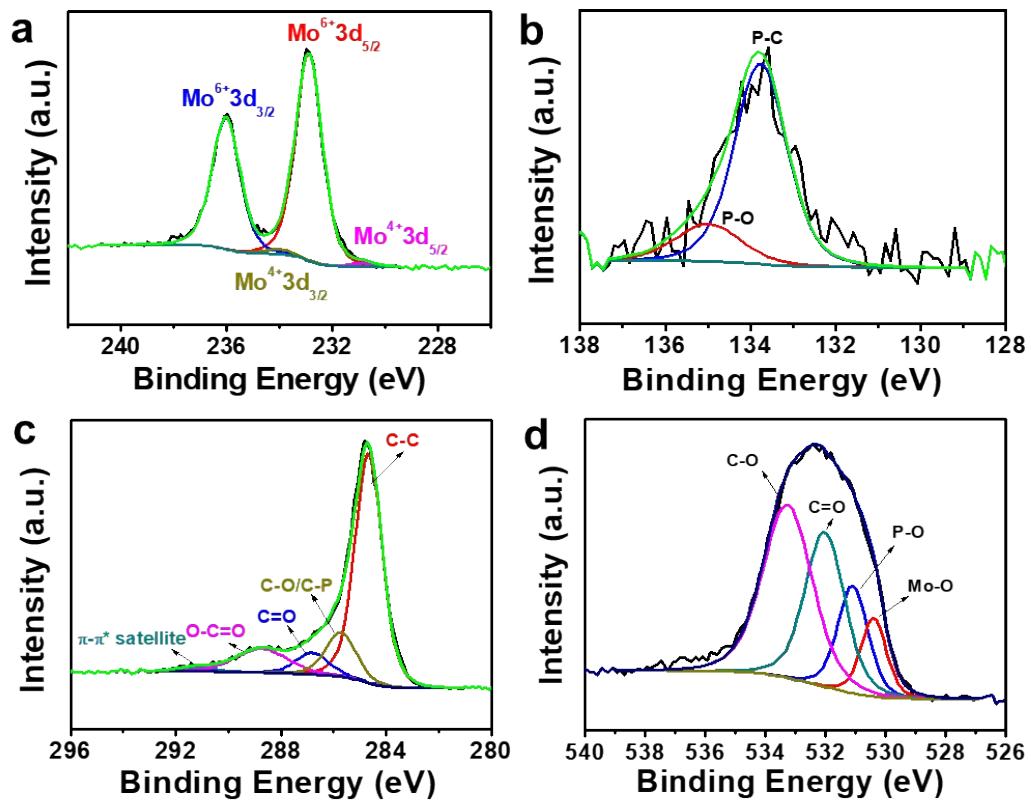

**Figure S8** High resolution XPS spectra for **2**. a, Mo 3d. b, P 2p. c, C1s and d, O1s.

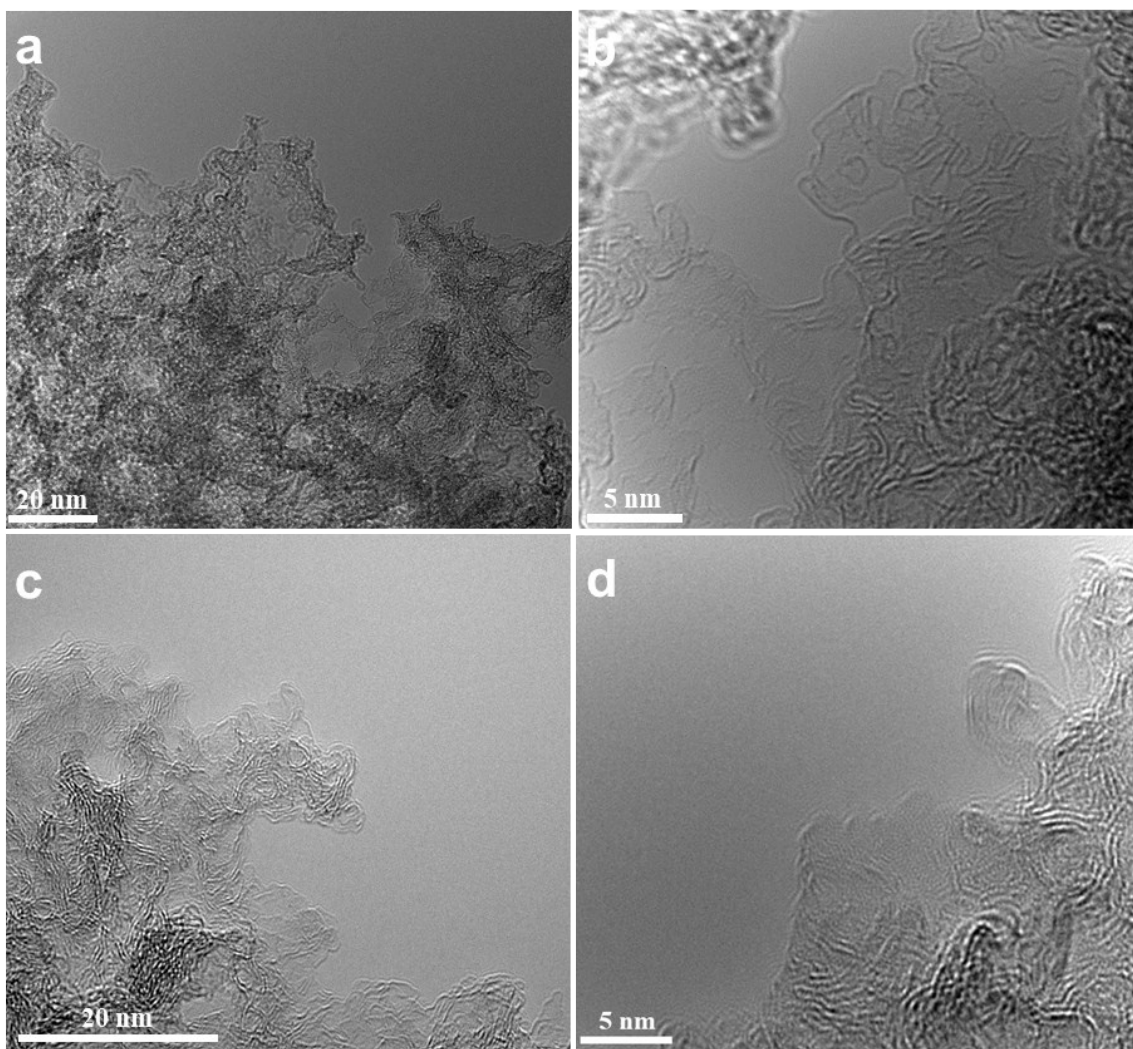

**Figure S9** Representative TEM and HRTEM images of MC (a,b) and NMC (c,d).

Pure **MC** reference materials were formed by the classical synthetic route where sulfuric acid was used as carbonization catalyst. Figure S9 shows the TEM and HRTEM images of **MC** (Figure S9a,b) and NMC (Figure S9c,d). Note that no crystalline particles or metal-oxo clusters were observed. Instead, we only observed a porous carbon structure.

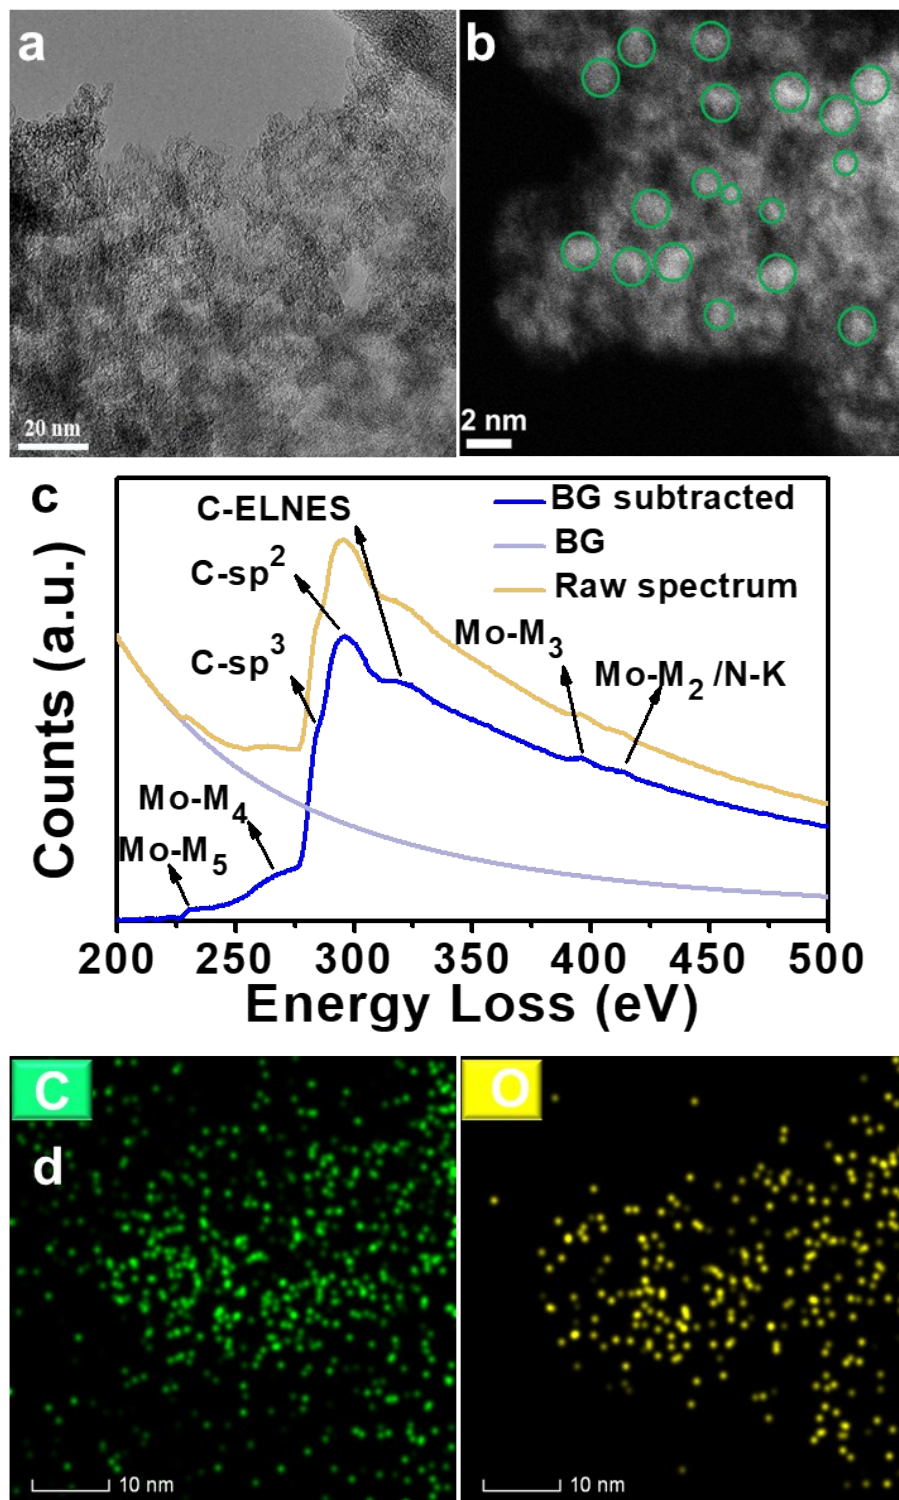

**Figure S10** Morphology and chemical structure of **3**. a, TEM image of **3**. b, HAADF-STEM image of **3**. c, EELS spectra recorded from the HAADF-STEM image. BG = background; C-ELNES = carbon fine structure electron loss near edge structure. d, STEM-EDS elemental mapping of **3**, showing the homogeneous distribution of C and O (for other elements see main manuscript).

**Table S3.** Results of linear combination fitting to the Mo K-edge XANES.

| Composite | MoO <sub>2</sub> Fraction (%) | MoO <sub>3</sub> Fraction (%) |
|-----------|-------------------------------|-------------------------------|
| 1         | 74                            | 26                            |
| 2         | 12                            | 88                            |
| 3         | 14                            | 86                            |

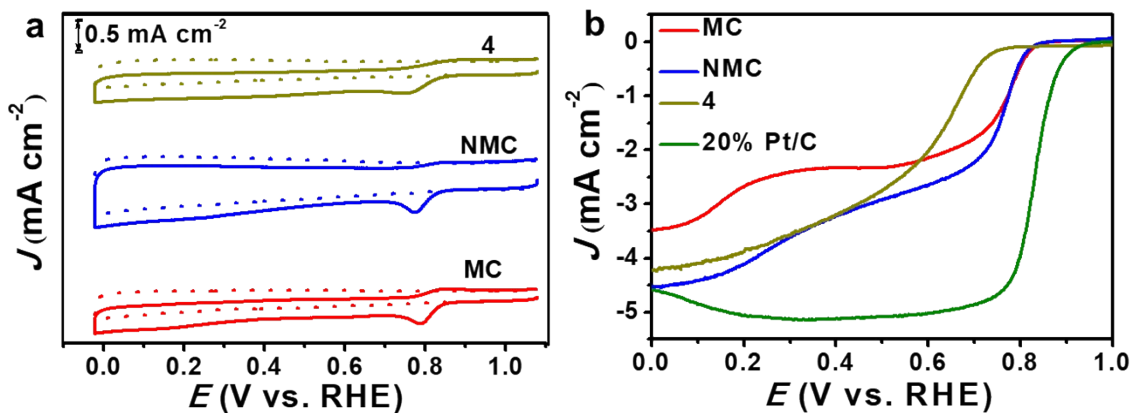

**Figure S11** ORR activity studied by using CV and RDE techniques. a, CV curves of MC, NMC and 4 in Ar- (dotted line) or O<sub>2</sub>-saturated (solid line) 0.1 M aqueous KOH at a sweep rate of 5 mV s<sup>-1</sup>. b, LSV polarization curves of MC, NMC, 4 and 20% Pt/C in O<sub>2</sub>-saturated 0.1 M aqueous KOH at a sweep rate of 5 mV s<sup>-1</sup>, the rotating speed was 1600 rpm.

In comparison, CV and LSV results (Figure S11) show that the **NMC** has similar activity to pure **MC**, indicating that the oxidation of **MC** by HNO<sub>3</sub> and the introduction of nitrogen did not lead to reactivity increases.

**Table S4** Electrocatalytic ORR activity of the different catalysts studied based on CV analysis

| Samples | $E_p$ (V vs. RHE) | $J_p$ (mA cm <sup>-2</sup> ) |
|---------|-------------------|------------------------------|
| 1       | 0.62              | -0.30                        |
| 2       | 0.78              | -0.31                        |
| 3       | 0.82              | -0.94                        |
| 4       | 0.74              | -0.36                        |
| MC      | 0.79              | -0.40                        |
| NMC     | 0.77              | -0.73                        |

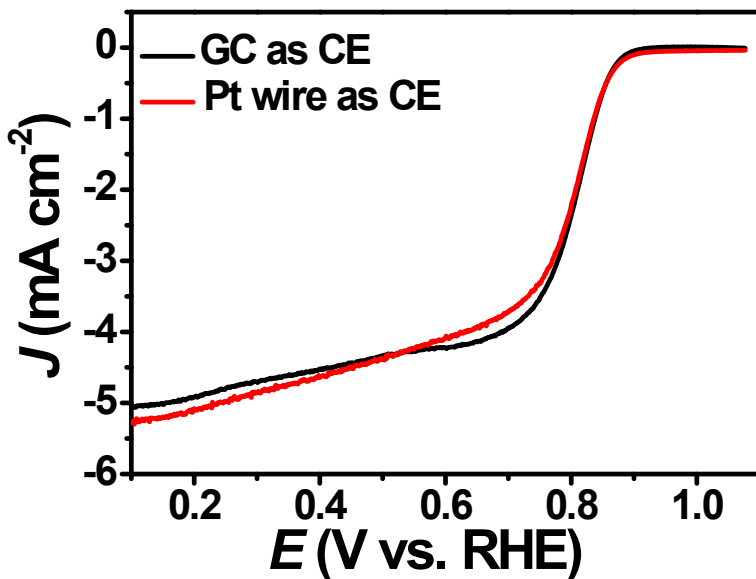

**Figure S12** LSV curves of **3** in  $O_2$ -saturated 0.1 M aqueous KOH at a sweep rate of  $5 \text{ mV s}^{-1}$  and rotating speed of 1600 rpm, by using glassy carbon (GC) and Pt wire as counter electrodes. Freshly prepared catalyst-modified electrodes were prepared and used for the two measurements.

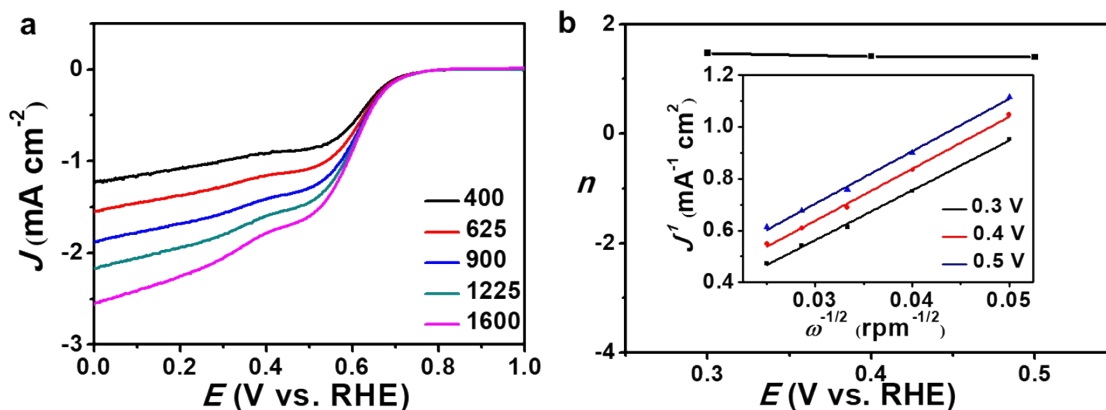

**Figure S13** ORR activity studied by RDE analysis. a, LSV polarization curves of **1** in  $O_2$ -saturated 0.1 M aqueous KOH at a sweep rate of  $5 \text{ mV s}^{-1}$  at varying rotation rates (400-1600 rpm). b, electron transfer number ( $n$ ) for **1** at different potentials obtained from K-L plots (see insert).

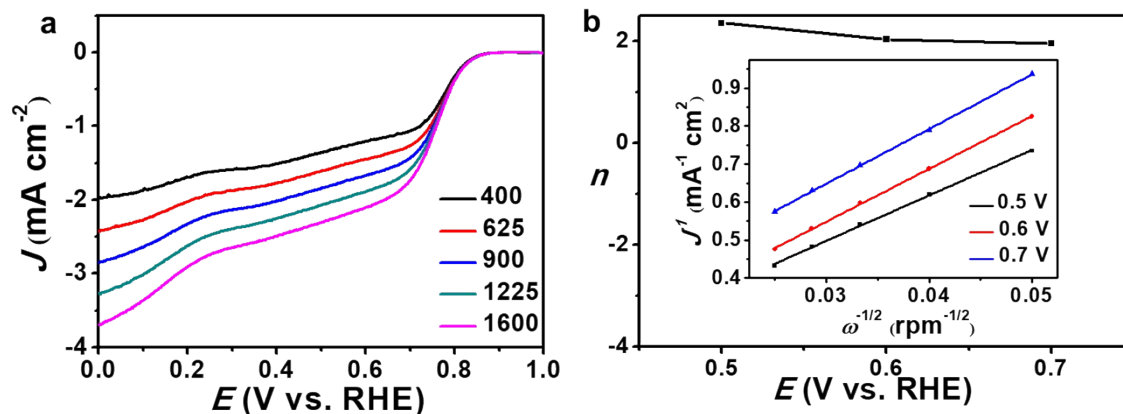

**Figure S14** ORR activity studied by RDE analysis. a, LSV polarization curves of a **2** in  $O_2$ -saturated 0.1 M aqueous KOH at a sweep rate of  $5 \text{ mV s}^{-1}$  with varying rotation rates (400-1600 rpm). b, electron transfer number ( $n$ ) for a **2** at different potentials obtained from K-L plots (see insert).

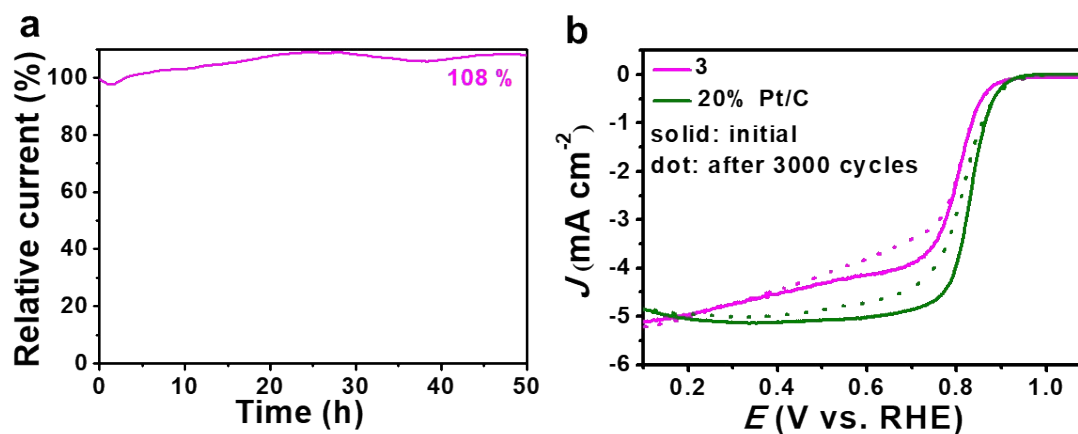

**Figure S15** a, Chronoamperometry of **3** modified RDE at 0.7 V vs. RHE in 0.1 M aqueous KOH with continuous  $O_2$  bubbling at 200 rpm for 50 h. b, LSV polarization curves of **3** and 20% Pt/C before and after 3000 cycles between 0.6 and 1.0 V (scan rate  $200 \text{ mV s}^{-1}$  in  $O_2$ -saturated 0.1 M aqueous KOH).

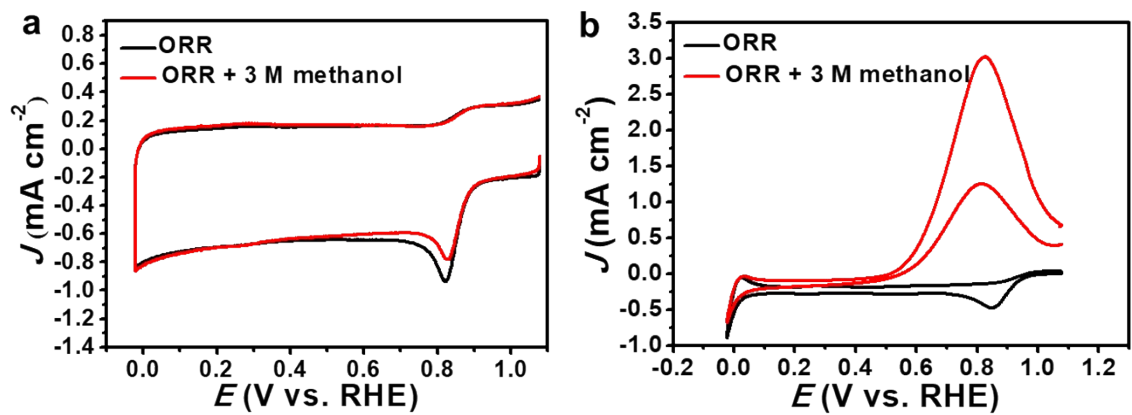

**Figure S16** Methanol tolerance tests. CV curves of a, **3** and b, 20% Pt/C in O<sub>2</sub>-saturated 0.1 M aqueous KOH (black) and O<sub>2</sub>-saturated 0.1 M aqueous KOH with 3 M methanol (red) solution at a scan rate of 5 mV s<sup>-1</sup>.



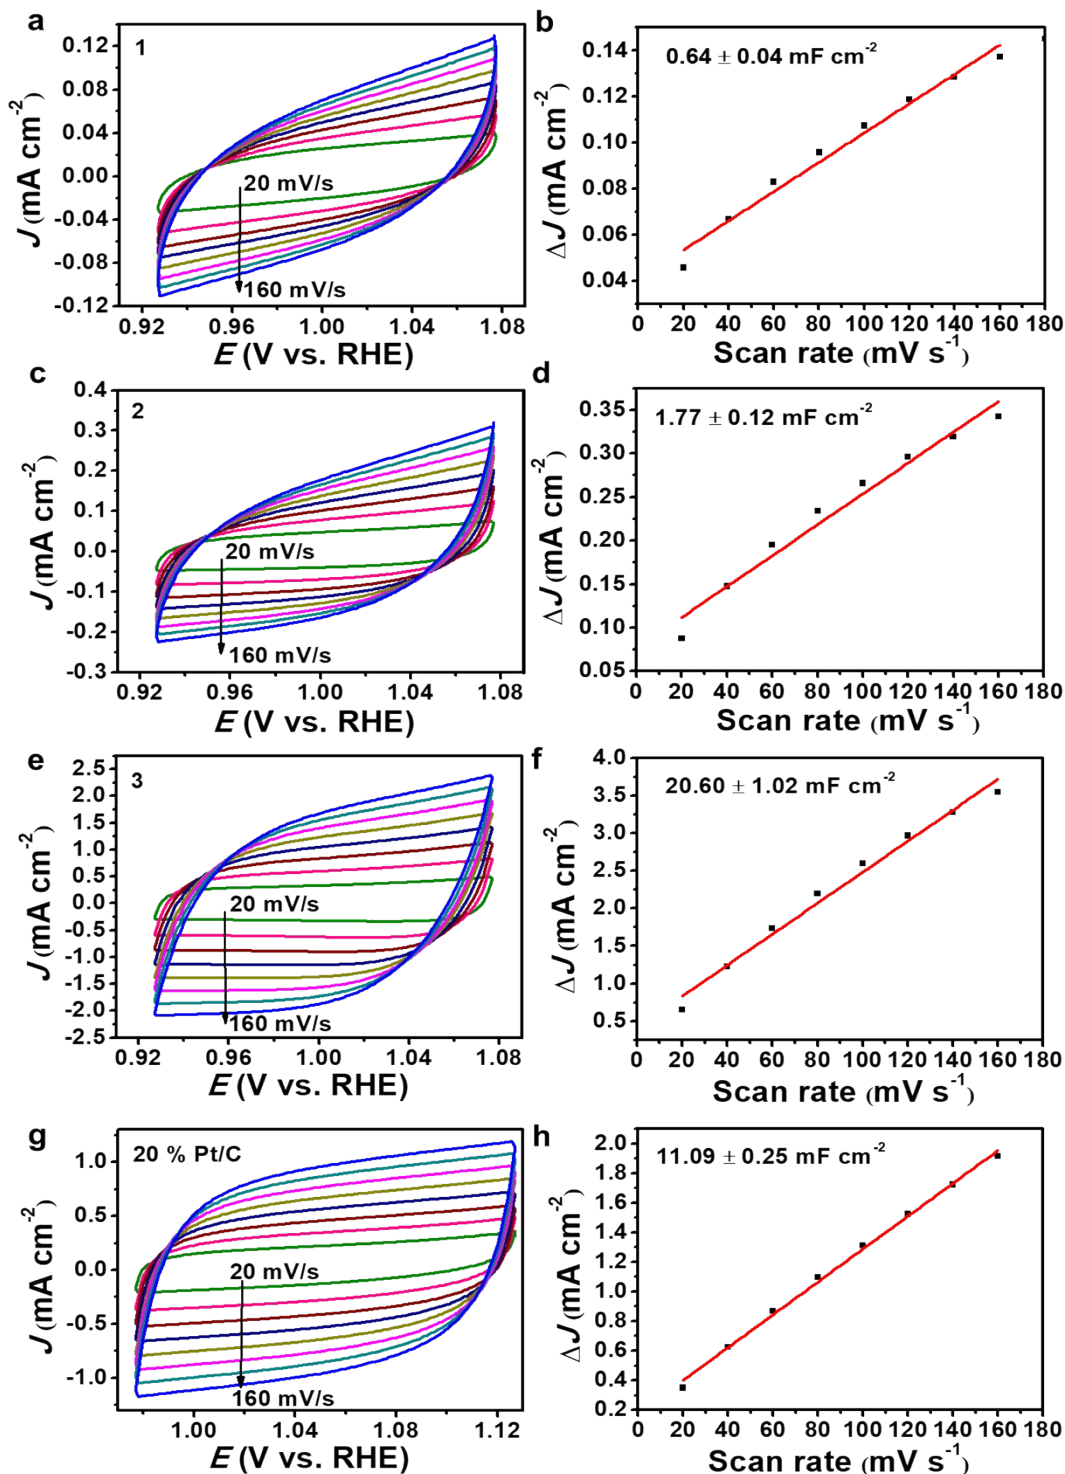

**Figure S17** ECSA study of the catalysts. a,c,e,g CV curves for 1, 2, 3 and 20% Pt/C at various scan rates. b,d,f,h The corresponding linear fitting plots of differences in current density ( $\Delta J = J_a - J_c$ ) at a potential of 1.0 V for 1, 2 and 3, and 1.05 V for 20% Pt/C depending on the scan rate.  $J_a$ : anodic current density;  $J_c$ : cathodic current density.

**ECSA is calculated based on the equations shown below:**<sup>10</sup>

(1)  $\Delta J = \gamma \times C_{dl}$

(2)  $ECSA = C_{dl}/C_s$

(3)  $C_s = 40 \mu\text{F}/\text{cm}^2$  per  $\text{cm}^2$

where  $\gamma$  is scanning rate,  $\Delta J (= J_a - J_c)$  is charging current density differences,  $C_{dl}$  is double-layer capacitance and  $C_s$  is specific capacitance of the catalyst.<sup>11</sup>

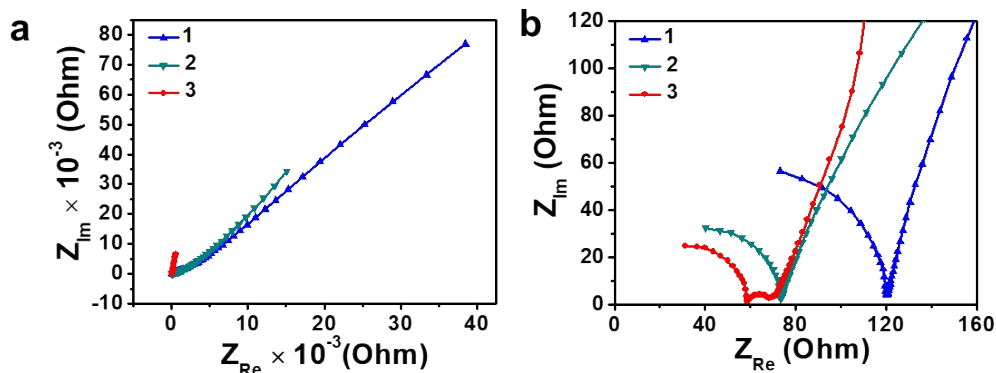

**Figure S18** EIS analyses of the composite electrocatalysts. a, Nyquist plots of **1**, **2** and **3** obtained by applying a sine wave with potential amplitude of 5.0 mV over the frequency range 0.01 Hz–1000 kHz. b, Corresponding high-frequency area of the Nyquist plots.

Figure S18a shows the Nyquist plots of **1**, **2** and **3** obtained by applying a sine wave with amplitude of 5.0 mV over the frequency range 0.01 Hz–1000 kHz. The equivalent series resistances extracted at 10 Hz of **1**, **2** and **3** are 1070, 610 and 76 Ohm, respectively. The Nyquist plots in the high-frequency region (Figure S18b) show that the diameter of the semicircle for **3** is smaller than that of **1** and **2**. The calculated charge-transfer resistances ( $R_{ct}$ ) are shown in Table 1 of the main manuscript. These data indicate that **3** has the lowest charge-transfer resistances which is beneficial for the catalysis.

#### 4. Supplementary references

- 1 J. J. Han, N. Li and T. Y. Zhang, *J. Power Sources*, 2009, **193**, 885–889.
- 2 A. J. Bard and L. R. Faulkner, *Electrochemical methods: fundamentals and applications*, John Wiley & Sons, New York, 2000.
- 3 S. Wang, D. Yu and L. Dai, *J. Am. Chem. Soc.*, 2011, **133**, 5182–5185.
- 4 L. Hao, S. Zhang, R. Liu, J. Ning, G. Zhang and L. Zhi, *Adv. Mater.*, 2015, **27**, 3190–3195.
- 5 K. Persson, 2014.
- 6 Y. Jin, H. Wang, J. Li, X. Yue, Y. Han, P. K. Shen and Y. Cui, *Adv. Mater.*, 2016, **28**, 3785–3790.
- 7 Y. Sun, X. Hu, W. Luo and Y. Huang, *ACS Nano*, 2011, **5**, 7100–7107.
- 8 Y. J. Tang, M. R. Gao, C. H. Liu, S. L. Li, H. L. Jiang, Y. Q. Lan, M. Han and S. H. Yu, *Angew. Chem. Int. Ed.*, 2015, **54**, 12928–12932.
- 9 A. Bhaskar, M. Deepa and T. Narasinga Rao, *ACS Appl. Mater. Interfaces*, 2013, **5**,

- 2555–2566.
- 10 C. C. L. McCrory, S. Jung, J. C. Peters and T. F. Jaramillo, *J. Am. Chem. Soc.*, 2013, **135**, 16977–16987.
- 11 J. Kibsgaard and T. F. Jaramillo, *Angew. Chem. Int. Ed.*, 2014, **53**, 14433–14437.
